# Supplementary material for: Minor Change of Plasma Renin Activity during the Saline Infusion Test Provide an Auxiliary Diagnostic Value for Primary Aldosteronism
Source: Hindawi journal article supplement (doi:10.1155/2021/5757305), 2021-02-17
Supplement: f1 [file 5757305.f1.zip]

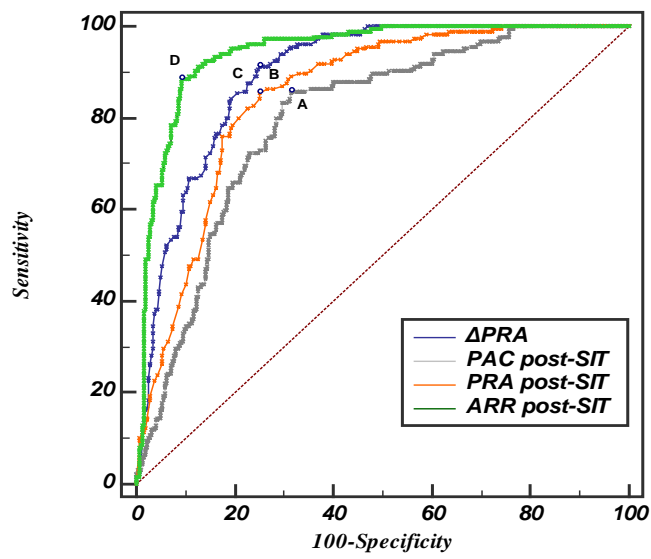

Supplementary Figure 1. Comparison of ROC curves of PRA post-SIT,  $\Delta$ PRA, ARR post-SIT with PAC post-SIT for primary aldosteronism (PA) diagnosis. ROC curve of PAC after saline infusion test(A); ROC curve of PRA after saline infusion test(B); ROC curve of reduction in PRA during saline infusion test(C); ROC curve of aldosterone–renin ratio after saline infusion test(D) to diagnose PA.
